# Supplementary material
Source: Research Square preprint supplement (doi:10.21203/rs.3.rs-8950299/v1)
Supplement: Supplementary file 1 [file 44ee1f05112e7a5a9957fbda.docx]

## Long-term environmental stability promotes reproducible, depth-structured sediment microbiomes

Hernández-Oaxaca Diana1,4, Lona-Téllez Yaxché1, Balvino-Olvera Francisco1, Pérez-Ceballos Rosela2,3, Olivares-Miranda Mizraim4, Carlos Burelo5, Ibarra-Laclette Enrique4, Vázquez-Rosas-Landa Mirna1*

1Unidad Académica de Ecología y Biodiversidad Acuática, Instituto de Ciencias del Mar y Limnología, Universidad Nacional Autónoma de México, Ciudad de México, México.

2Instituto de Ciencias del Mar y Limnología Estación El Carmen, Universidad Nacional Autónoma de México, Ciudad del Carmen, México.

3Secretaría de Ciencias, Humanidades, Tecnología e Innovación (SECIHTI).

4Red de Estudios Moleculares Avanzados, Campus III, Instituto de Ecología A. C., Carretera Antigua a Coatepec 351, Xalapa, Veracruz, CP 91073, México.

5Laboratorio de Manglares Interiores. División Académica de Ciencias Biológicas. Universidad Juárez Autónoma de Tabasco. México

***Corresponding Author:**

Vázquez-Rosas-Landa Mirna1

1 Unidad Académica de Ecología y Biodiversidad Acuática, Instituto de Ciencias del Mar y Limnología, Universidad Nacional Autónoma de México, Ciudad de México, México.

**Email address:**

mvazquez@cmarl.unam.mx


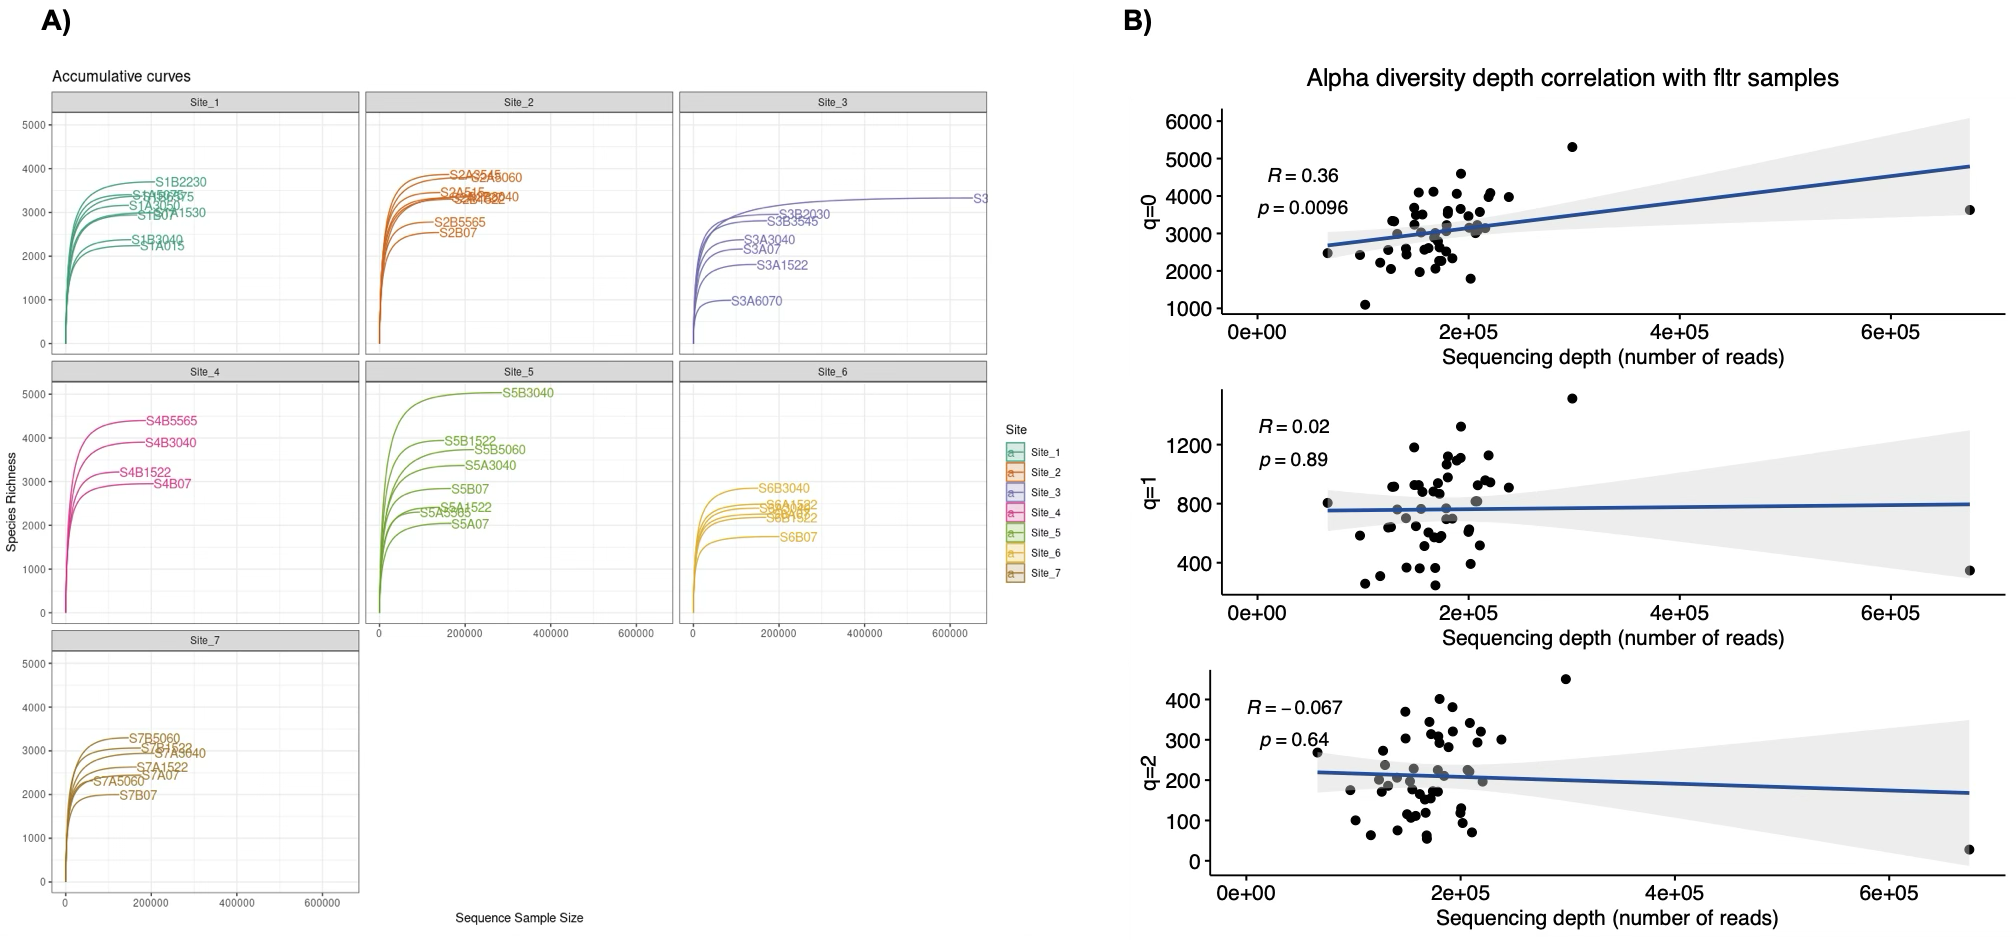


Figure S1. Sampling effort curves and depth sequencing correlation with alpha diversity. A) Accumulation curves of observed richness. The curves show that most samples reach an asymptote, indicating adequate capture of microbial diversity. B) Relationship between sequencing depth (number of reads) and alpha diversity estimated by Hill numbers (q=0, q=1, and q=2).


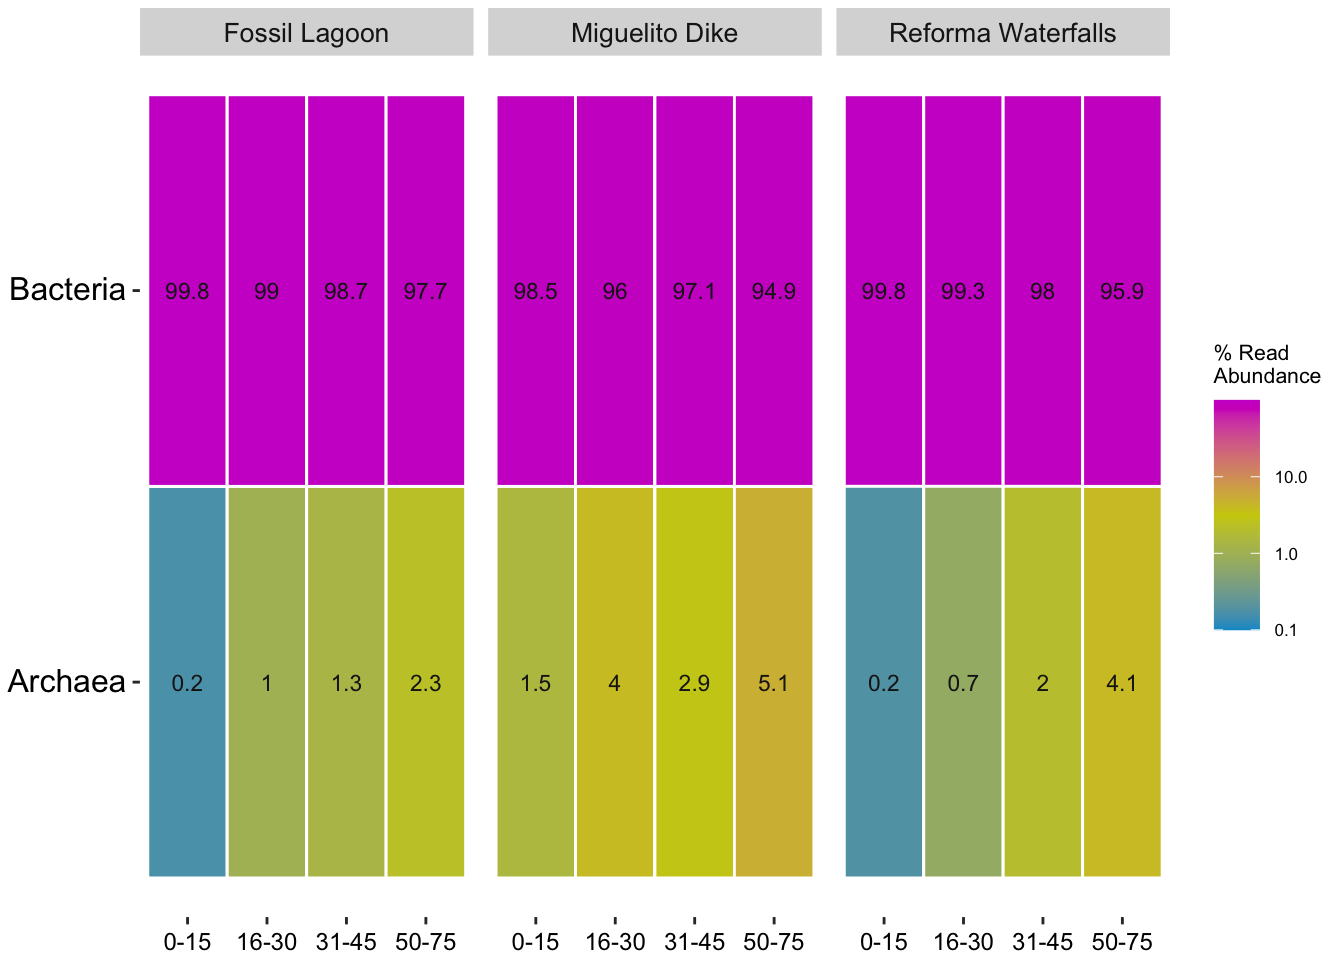


Figure S2. Relative abundance of readings assigned to Bacteria and Archaea domains in inland mangrove sediments along the Rio San Pedro Martir, distributed by locality and depth. The color gradient from blue to magenta indicates the percentage of abundance.


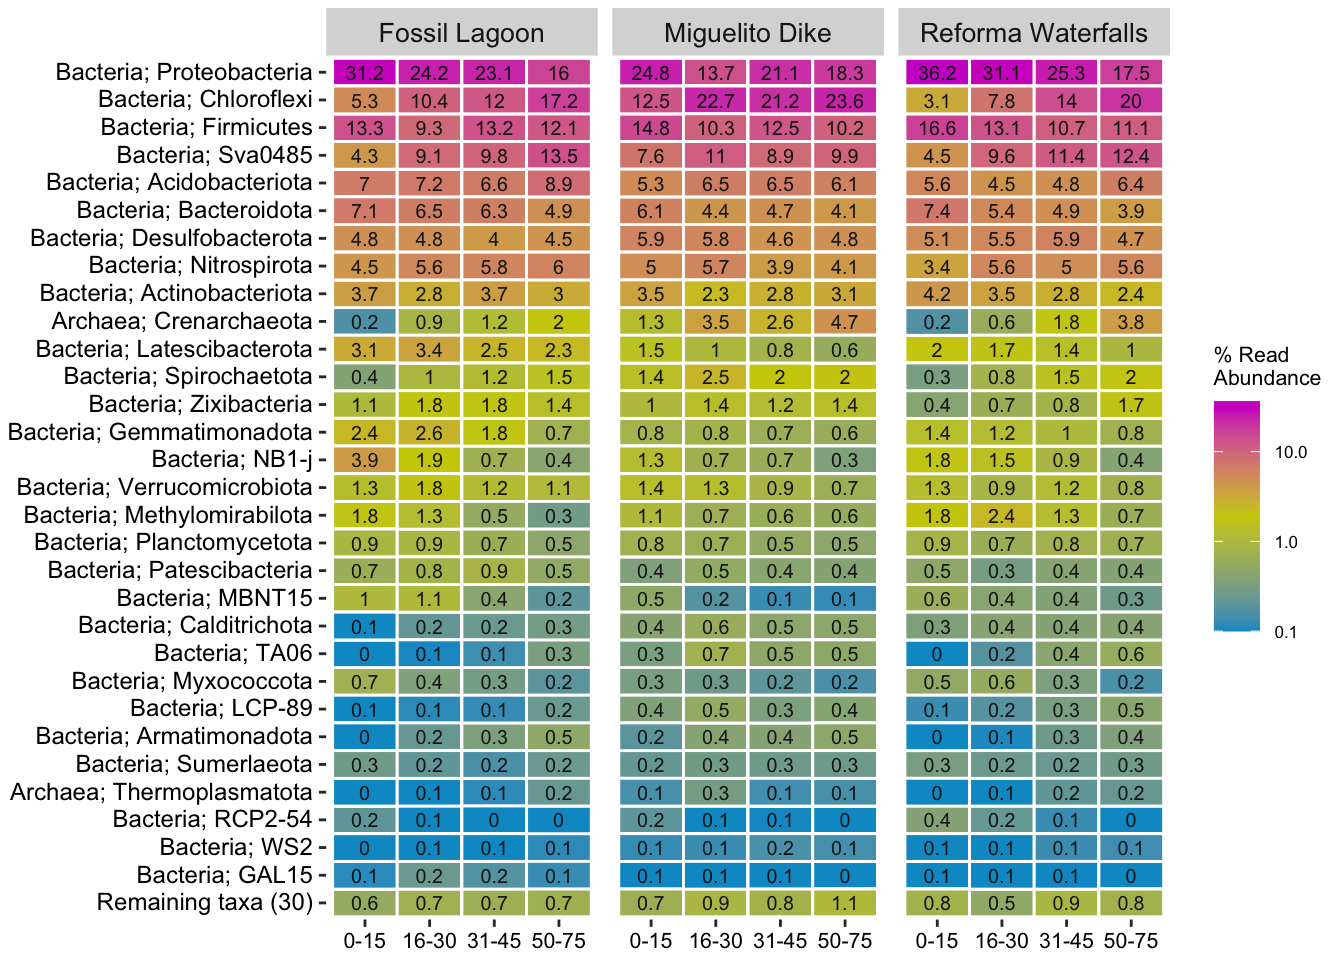


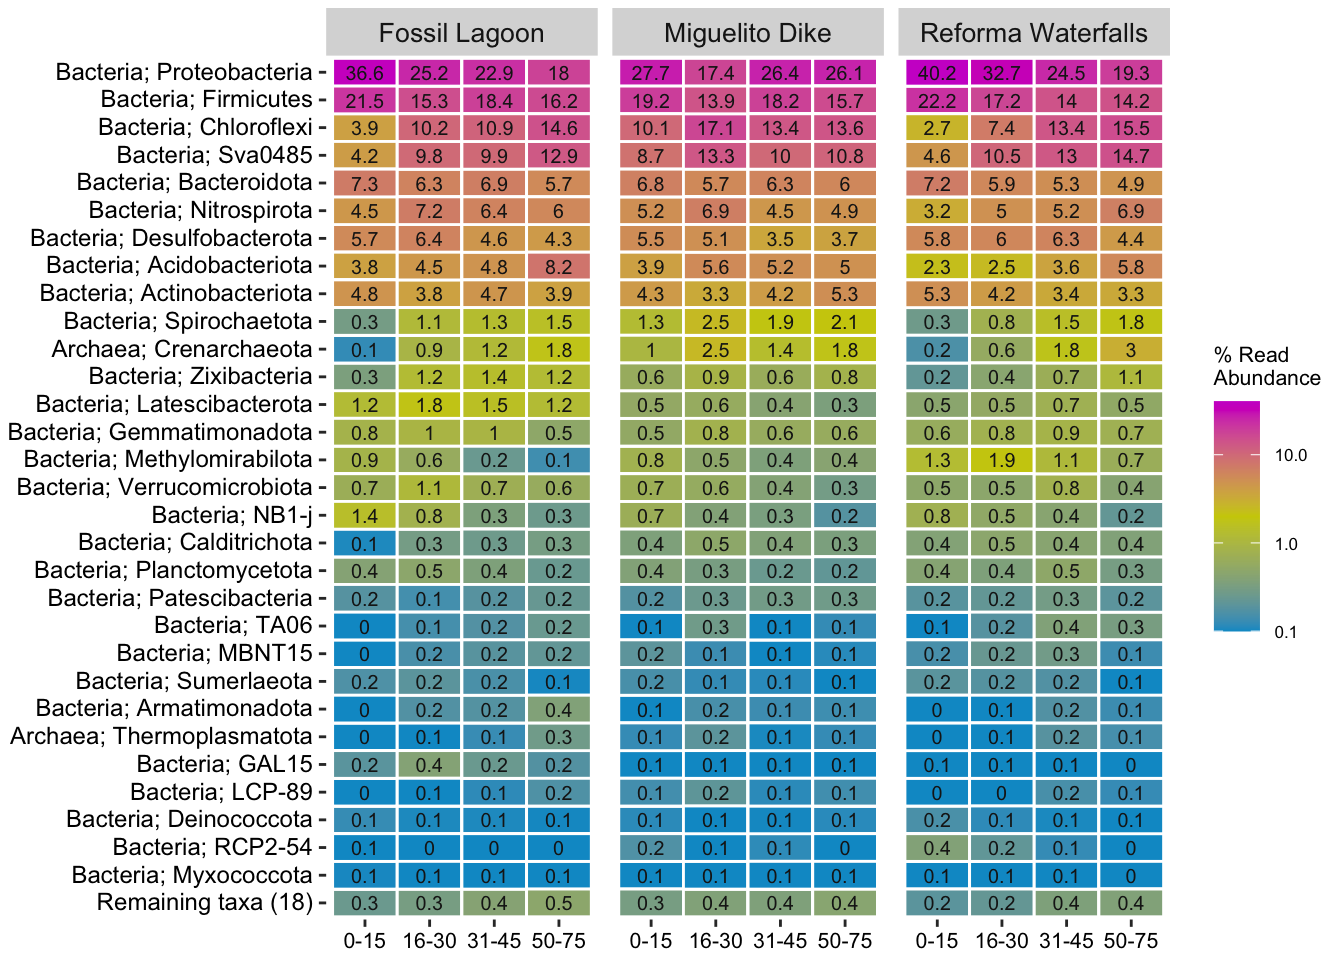


Figure S3. Phylum distribution between depths and localities, in the whole community and the microbial core. A) Relative abundance (%) of all microbial phyla detected in the localities at different depths. B) Relative abundance of microbial phyla belonging to the microbial core, defined as taxa shared among all depths and localities. The color gradient from blue to magenta indicates the percentage of abundance


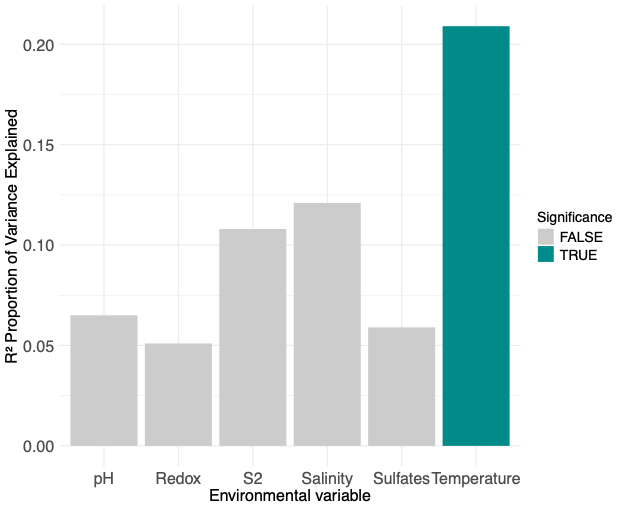


|  | F | p-value | Explained | Cumulative |
| --- | --- | --- | --- | --- |
| CAP1 | 5.04 | 0.15 | 0.325 | 0.325 |
|  |  |  |  |  |
| CAP2 | 1.82 | 0.76 | 0.117 | 0.443 |
| CAP3 | 1.27 | 0.83 | 0.0818 | 0.5247 |
| CAP4 | 0.63 | 0.96 | 0.0405 | 0.5652 |
| CAP5 | 0.41 | 0.97 | 0.0265 | 0.5916 |
| CAP6 | 0.32 | 0.97 | 0.0208 | 0.6124 |

Figure S4. Contribution of physicochemical variables to microbial composition in inland mangrove sediments along the Rio San Pedro Martir. A) The graph represents the R² values derived from a permutational analysis (PERMANOVA), evaluating the influence (y-axis) of the environmental variables (x-axis). B) db-RDA variance explained of each canonical axis. Columns indicate: F statistic, p-value, variance and the cumulative variance calculated by the permutational like ANOVA.
