# Supplementary material
Source: Research Square preprint supplement (doi:10.21203/rs.3.rs-8950299/v1)
Supplement: Supplementary file 2 [file adb18d13a1bd2b930e5b48e6.xlsx]

## Sheet: Supplementary Table S1
Supplementary Table S1. Number of reads and ASVs in samples processed throughout the stages of bioinformatics analysis of coastal mangroves.
ID	Raw	Quality filter	Derep	ASVs R1	ASVs R2	Merged	nonchim	Frecuence filter	ASV
SRR9973320	105038	96289	96289	90569	91604	76907	76450	46380	1439
SRR9973321	126323	108604	108604	103720	104614	93603	93261	55378	1209
SRR9973322	66907	62999	62999	58920	59661	50459	50196	33562	1119
SRR9973323	119793	113294	113294	106783	108135	91510	90817	52127	938
SRR9973324	123804	114898	114898	107470	108960	92715	92446	54998	1256
SRR9973325	95129	89703	89703	84038	85449	74298	73844	46667	869
SRR9973326	43274	40920	40920	36610	37833	30835	30607	18904	1287
SRR9973327	123081	114886	114886	107294	109004	92372	92067	59469	1379
SRR9973331	166637	156688	156688	146768	148918	123370	122954	78596	951
SRR9973332	114434	106915	106915	99307	100923	82257	81751	49005	1452
SRR9973344	120588	112110	112110	105735	107263	92270	91880	58712	1348
zr2502_10	38700	21871	21871	20723	20838	15903	15569	10495	519
zr2502_11	24823	10531	10531	8777	8606	5903	5781	3624	600
zr2502_12	31042	15217	15217	12721	13188	9164	8987	6082	680
zr2502_13	28991	14782	14782	12228	12474	7846	7712	5046	515
zr2502_14	38685	21032	21032	17324	18015	11671	11491	6635	826
zr2502_15	51231	27819	27819	23949	24251	16787	16594	10031	1172
zr2502_17	28923	13214	13214	11404	11436	8583	8459	5527	614
zr2502_18	42031	22262	22262	20180	20428	15866	15631	9249	968
zr2502_19	29747	15833	15833	14199	14269	10817	10597	6472	796
zr2502_1	29845	13541	13541	10376	10942	6779	6664	3581	706
zr2502_20	21331	10293	10293	8761	8910	6435	6348	4090	537
zr2502_21	34105	18791	18791	17635	17878	13552	13419	7952	463
zr2502_22	36228	20631	20631	20034	20081	14915	14762	10468	253
zr2502_23	40498	22771	22771	21387	21540	16048	15851	12310	470
zr2502_24	37728	19595	19595	17375	17578	13700	13391	8139	885
zr2502_25	30758	14654	14654	13044	12866	10322	10187	6309	740
zr2502_26	48881	26906	26906	24846	24843	20371	19879	13820	939
zr2502_27	24780	13759	13759	12609	12694	9960	9788	6467	525
zr2502_28	27224	13365	13365	11911	11973	9438	9250	5939	754
zr2502_29	25356	13333	13333	12059	12019	9515	9331	6148	666
zr2502_2	63319	34739	34739	29785	30790	20918	20529	11210	1184
zr2502_30	49134	25496	25496	22033	22427	16338	16040	9984	992
zr2502_31	35693	18242	18242	16107	16139	12834	12595	7823	951
zr2502_32	40723	21686	21686	19164	19331	15031	14740	9558	953
zr2502_33	28881	15777	15777	14278	14393	11061	10886	8759	521
zr2502_34	49957	27891	27891	25600	25815	19533	19067	13830	810
zr2502_35	28955	17150	17150	15552	15700	11747	11591	9416	598
zr2502_36	22031	11179	11179	10172	10218	7684	7587	5458	335
zr2502_37	27964	16636	16636	15390	15617	12007	11754	8415	366
zr2502_38	57515	33375	33375	31480	31538	24846	24223	15089	794
zr2502_39	37310	22575	22575	21691	21640	17090	16894	12402	508
zr2502_3	33589	18414	18414	15374	15855	10566	10426	5924	942
zr2502_40	48325	27029	27029	24869	25147	19940	19576	12671	947
zr2502_41	28111	15691	15691	15106	15109	11510	11155	7351	323
zr2502_42	49387	30377	30377	29416	29554	23676	23138	16510	469
zr2502_43	32718	19888	19888	18982	19103	14982	14604	9913	469
zr2502_44	23458	13075	13075	12536	12573	10150	9909	7285	253
zr2502_45	33224	19446	19446	18090	18206	13875	13642	9536	432
zr2502_46	33914	19359	19359	17613	17666	14020	13704	9137	865
zr2502_47	31446	17243	17243	15402	15433	12206	12027	7688	867
zr2502_48	47889	27011	27011	24789	24855	21014	20390	12559	959
zr2502_49	35316	15793	15793	13284	13502	9991	9768	5712	747
zr2502_4	44217	20994	20994	18709	18894	14348	14083	9023	922
zr2502_50	38652	19483	19483	17707	17708	14472	14021	9359	902
zr2502_51	26072	13608	13608	12357	12226	10414	10016	6630	564
zr2502_52	19844	9421	9421	8249	8400	6517	6372	3976	523
zr2502_53	32060	16018	16018	14318	14315	10928	10649	7097	827
zr2502_54	38258	20041	20041	18315	18057	14435	14141	10204	751
zr2502_5	35336	18613	18613	15952	16336	11942	11814	6727	938
zr2502_6	45487	24059	24059	20459	21010	14655	14189	10075	957
zr2502_7	41626	24223	24223	21598	22030	16126	15944	12156	886
zr2502_8	74404	40531	40531	36537	37298	28091	27650	16644	1368
zr2502_9	31157	15070	15070	13027	13228	9756	9551	5860	690
							No Reads		No. ASVs
Number samples							64		64
Total count							1016163		2644
Min							3581		253
Max							78596		1452
Median							9387.5		818
Mean							15877.3		804.5
Std dev							17185.8		301.21

## Sheet: Supplementary Table S2
Supplementary Table S2. Number of reads and ASVs in samples processed throughout the stages of bioinformatics analysis of inland mangroves
Samples	Raw	Qual_filter	Derep	ASVs R1	ASVs R2	Merged	nonchim	Frecuence Filter	ASVs
S1A015	342327	306289	304350	295487	294918	267186	243075	174117	2267
S1A1530	353082	319333	317482	309783	309247	283150	259656	208623	3082
S1A3050	253549	226138	224633	217188	216792	195353	180106	148635	3234
S1A5075	258518	234172	232697	226434	224958	204964	186780	156229	3506
S1B07	320547	288455	286743	277462	276826	250644	207979	168337	3011
S1B2230	381400	345852	343553	332878	332681	296258	269989	218877	3973
S1B3040	286283	255616	253735	246637	246816	220753	195670	161923	2609
S1B6575	352640	322118	320005	308769	309694	269656	248565	192421	3655
S2A1727	330795	301132	299212	281667	287669	242557	222774	180373	3603
S2A3545	328144	296173	294199	282013	281279	249835	221471	166680	4115
S2A5060	395326	358239	355911	343611	343307	305076	272136	220547	4079
S2A515	261496	238172	236649	227373	228095	200551	185160	148403	3687
S2B07	286496	259654	257889	244242	246849	214680	194588	140634	2596
S2B1522	309385	281402	279690	270250	270019	241425	222363	180259	3528
S2B3040	340093	307567	305751	297645	297603	271739	245980	210603	3574
S2B5565	220967	199442	198285	193280	192088	173513	153696	132348	2987
S3A07	233674	208416	207147	198964	198544	176805	148307	116212	2219
S3A1522	259804	234111	232620	227219	226623	206865	181992	153653	1969
S3A3040	229482	204459	203028	195949	195361	172958	157276	123813	2559
S3A6070	177807	161347	160260	157185	156946	144768	129115	101979	1096
S3B2030	357597	324135	322096	312333	312826	279503	250290	208195	3223
S3B3545	321667	289882	287923	277404	278678	246817	214662	178782	3061
S3B515	230907	209682	208372	199687	200015	175751	158983	129415	3323
S3B6070	1074036	977072	971009	954998	954677	883494	784046	674846	3627
S4B07	381507	347244	345187	331902	332497	297141	271636	206504	3009
S4B1522	219117	199795	198625	191140	191068	170744	155662	127631	3335
S4B3040	326041	295359	293421	284282	284151	256199	232022	188746	4060
S4B5565	331626	302547	300810	291726	290257	259395	237711	192728	4596
S5A07	337694	302784	300905	291822	291707	265292	219681	168544	2060
S5A1522	253669	228588	227163	220480	220393	201897	170883	141134	2438
S5A3040	347506	309813	307848	299674	299629	274387	236111	199818	3461
S5A5565	160683	145871	144886	140669	140115	127264	113751	97081	2425
S5B07	304182	276676	275145	265567	265519	240011	208619	167372	2889
S5B1522	318445	292911	291202	269650	277151	220508	187624	152741	4093
S5B3040	519530	472949	470139	452818	454139	402860	371996	298225	5308
S5B5060	407409	371378	368802	354457	358694	314968	285606	238077	3973
S6A07	339106	305619	303854	295450	294209	268201	242681	184588	2336
S6A1522	304546	276409	274684	267022	265894	243312	223637	172459	2627
S6A3040	281949	253708	252152	246371	244451	225319	196309	158088	2566
S6B07	437642	396473	394003	380499	380711	341663	297786	201962	1792
S6B1522	304421	276841	274893	265940	266411	243189	215407	172074	2267
S6B3040	288026	258197	256281	246691	246957	222974	199403	154919	3026
S7A07	382789	342787	340610	327397	327334	290989	265962	178714	2518
S7A1522	292933	263517	261810	254510	253556	232171	215697	170899	2793
S7A3040	395227	352708	350223	339937	339441	307221	281893	215740	3143
S7A5060	141888	129337	128459	118982	121587	98137	88901	66413	2474
S7B07	268133	236232	234484	223337	221773	193429	173405	126406	2051
S7B1522	340074	309965	308083	295822	295235	263361	240979	179161	3222
S7B3040	336911	304166	302081	296037	294044	273421	238858	200519	3153
S7B5060	264737	240488	238942	232813	231376	210299	182046	150051	3493
								No. Reads	No. ASV
Number samples								50	50
Total count								9006498	7097
Min								66413	1096
Max								674846	5308
Median								171487	3072
Mean								180130	3074
Std dev								80669	771

## Sheet: Supplementary Table S3
Supplementary Table S3. Summary of linear models and pairwise comparisons for microbial alpha diversity across mangrove systems. Hill numbers (q0, q1, q2) were modeled as response variables. For observed richness (q0), sequencing depth was included as a continuous covariate. The table reports global model statistics (Adjusted R2, F-statistic, and p-values) followed by post-hoc Tukey comparisons (…
Hill number	R2	Adjusted R2	F-statistic	p-value	df	df.residual
q0	0.8562	0.83	32.7401	5.7e-09	4	22
q1	0.7028	0.6641	18.1321	2.9292e-06	3	23
q2	0.8095	0.7846	32.5703	1.88e-08	3	23
Pairwise comparisons of microbial alpha diversity
metric	contrast	estimate	SE	df	t.ratio	p.value
q0	Fossil Lagoon - Celestún Lagoon	-173.67	142.4	22	-1.22	0.621403
q0	Fossil Lagoon - San Pedro River	-217.81	104.59	22	-2.08	0.189887
q0	Fossil Lagoon - Términos Lagoon	399.13	367.62	22	1.09	0.701658
q0	Celestún Lagoon - San Pedro River	-44.14	120.24	22	-0.37	0.982651
q0	Celestún Lagoon - Términos Lagoon	572.8	267.82	22	2.14	0.172176
q0	San Pedro River - Términos Lagoon	616.94	353.79	22	1.74	0.326121
q1	Fossil Lagoon - San Pedro River	9.32	57.45	23	0.16	0.998434
q1	Fossil Lagoon - Términos Lagoon	221.17	73.01	23	3.03	0.0283643
q1	Fossil Lagoon - Celestún Lagoon	-196.16	55.82	23	-3.51	0.00937039
q1	San Pedro River - Términos Lagoon	211.85	63.73	23	3.32	0.0145723
q1	San Pedro River - Celestún Lagoon	-205.48	42.97	23	-4.78	0.00043635
q1	Términos Lagoon - Celestún Lagoon	-417.33	62.27	23	-6.7	4.41e-06
q2	Fossil Lagoon - San Pedro River	0.78	24.14	23	0.03	0.999988
q2	Fossil Lagoon - Términos Lagoon	35.36	30.68	23	1.15	0.66188
q2	Fossil Lagoon - Celestún Lagoon	-147.01	23.46	23	-6.27	1.213e-05
q2	San Pedro River - Términos Lagoon	34.58	26.78	23	1.29	0.577619
q2	San Pedro River - Celestún Lagoon	-147.79	18.06	23	-8.18	1.7e-07
q2	Términos Lagoon - Celestún Lagoon	-182.37	26.17	23	-6.97	2.39e-06

## Sheet: Supplementary Table S4
Supplementary Table S4. Multivariate analysis of microbial community composition (PERMANOVA) and dispersion (PERMDISP) across mangrove systems. Results are based on Bray–Curtis dissimilarities. The table reports the variance explained (R2) and significance (p-value) for mangrove type and system identity, along with the F-statistic and significance for multivariate dispersion (PERMDISP). The lower…
Factor	R2	p_val	Disper_F	Disper_p
Mangrove Type	0.2561	0.001	5.6392	0.021
Mangrove system	0.1998	0.001	3.8814	0.017
pairwise PERMANOVA comparisons between specific geographic locations
Comparison	R2	F.Model	p.value	p.adjusted
San Pedro River_vs_Fossil Lagoon	0.204	2.818	0.007	0.0084
San Pedro River_vs_Celestún Lagoon	0.332	8.962	0.001	0.003
San Pedro River_vs_Términos Lagoon	0.409	6.91	0.005	0.0075
Fossil Lagoon_vs_Celestún Lagoon	0.351	7.032	0.001	0.003
Fossil Lagoon_vs_Términos Lagoon	0.523	5.483	0.029	0.029
Celestún Lagoon_vs_Términos Lagoon	0.297	5.074	0.002	0.004

## Sheet: Supplementary Table S5
Supplementary Table S5. Linear mixed-effects models and estimated marginal means for microbial alpha diversity across sediment depths. Global model statistics (upper panel) report F statistic and significance for sequencing depth (covariate), sediment depth, and mangrove system identity for each Hill number (q0, q1, q2). The lower panel shows the estimated marginal means (emmean) with 95% confide…
Metric	Factor	F value	p_value
q0	log(Effective_reads)	439.976	0
q0	Depths	1.46223	0.24028
q0	Mangrove.system	5.88188	0.00476083
q1	log(Effective_reads)	75.634	0
q1	Depths	0.729457	0.486617
q1	Mangrove.system	4.72502	0.0126275
q2	log(Effective_reads)	28.0728	1.9606e-06
q2	Depths	1.28853	0.283584
q2	Mangrove.system	4.15896	0.0206069
Pairwise comparisons of microbial alpha diversity
Metric	Mangrove.system	Depths	emmean	SE	lower.CL	upper.CL	Significance
q0	Términos Lagoon	Surface	968.688	257.846	451.515	1485.86	a
q0	Fossil Lagoon	Surface	1187.12	107.057	972.391	1401.85	a
q0	San Pedro River	Surface	1409.44	71.177	1266.68	1552.2	a
q0	Términos Lagoon	Mid	900.2	226.212	446.475	1353.92	a
q0	Fossil Lagoon	Mid	1346.91	107.173	1131.94	1561.87	ab
q0	San Pedro River	Mid	1515.61	71.994	1371.2	1660.01	b
q0	Términos Lagoon	Deep	898.423	225.176	446.776	1350.07	a
q0	Fossil Lagoon	Deep	1439.51	86.927	1265.15	1613.86	ab
q0	San Pedro River	Deep	1544.82	53.356	1437.8	1651.84	b
q1	Términos Lagoon	Surface	39.671	119.223	-199.461	278.802	a
q1	San Pedro River	Surface	291.631	32.911	225.62	357.641	a
q1	Fossil Lagoon	Surface	301.978	49.501	202.691	401.265	a
q1	Términos Lagoon	Mid	19.747	104.597	-190.047	229.541	a
q1	San Pedro River	Mid	358.934	33.289	292.165	425.703	b
q1	Fossil Lagoon	Mid	387.779	49.555	288.385	487.174	b
q1	Términos Lagoon	Deep	6.237	104.118	-202.596	215.07	a
q1	Fossil Lagoon	Deep	310.811	40.194	230.193	391.429	b
q1	San Pedro River	Deep	344.64	24.671	295.156	394.123	b
q2	Términos Lagoon	Surface	2.281	50.285	-98.578	103.14	a
q2	San Pedro River	Surface	86.992	13.881	59.151	114.834	a
q2	Fossil Lagoon	Surface	89.054	20.878	47.177	130.93	a
q2	Términos Lagoon	Mid	-15.925	44.116	-104.41	72.561	a
q2	San Pedro River	Mid	120.524	14.04	92.362	148.685	b
q2	Fossil Lagoon	Mid	138.529	20.901	96.608	180.451	b
q2	Términos Lagoon	Deep	-30.14	43.914	-118.22	57.939	a
q2	Fossil Lagoon	Deep	94.39	16.952	60.388	128.393	b
q2	San Pedro River	Deep	110.135	10.405	89.264	131.006	b

## Sheet: Supplementary Table S6
Supplementary Table S6. Multivariate analysis of community structure (PERMANOVA) and dispersion (PERMDISP) across systems and depths. Results are based on Bray–Curtis dissimilarities. The table reports the variance explained (R2), F-statistic, and significance (p-value) for mangrove system identity, sediment depth, and their interaction. The final column displays p-values for homogeneity of multi…
Factor	Df	R2	F.Model	p_value	Dispersion_p
Mangrove.system	2	0.3337	16.6709	0.001	0
Depths	2	0.0427	2.1318	0.012	0.7232
Mangrove.system:Depths	4	0.083	2.0741	0.004	NA

## Sheet: Supplementary Table S7
	Supplementary Table S7. Linear mixed-effects models (LMM) and pairwise comparisons of microbial alpha diversity between relict and impaired mangroves. The upper panel summarizes LMM results for Hill numbers (q0, q1, q2), reporting estimates, standard errors, and t-statistics. The model accounts for sequencing depth as a covariate and treats sediment cores as a random effect to control for repeate…
	Metric	Term	Estimate	Std.Error	Statistic	p_value
	q0	(Intercept)	-2363.61	635.214	-3.721	0.0005
	q0	log(Effective_reads)	278.236	70.0378	3.9727	0.0003
	q0	Mangrove_systemFossil Lagoon	392.384	229.774	1.7077	0.094
	q0	Mangrove_systemSan Pedro River	559.277	223.788	2.4991	0.0157
	q0	DepthMid	105.088	52.0215	2.0201	0.0501
	q0	DepthDeep	135.911	47.1492	2.8826	0.0063
	q1	(Intercept)	75.8139	47.3367	1.6016	0.1258
	q1	Mangrove_systemFossil Lagoon	221.625	58.6179	3.7808	0.0019
	q1	Mangrove_systemSan Pedro River	228.234	51.2	4.4577	0.0005
	q1	DepthMid	55.2217	27.7839	1.9875	0.0535
	q1	DepthDeep	29.5227	24.9588	1.1829	0.2436
	q2	(Intercept)	40.6831	19.4856	2.0879	0.049
	q2	Mangrove_systemFossil Lagoon	50.9191	23.5111	2.1657	0.0467
	q2	Mangrove_systemSan Pedro River	52.3817	20.5466	2.5494	0.022
	q2	DepthMid	25.3044	13.3139	1.9006	0.0644
	q2	DepthDeep	9.2451	11.9563	0.7732	0.4438
	Pairwise comparisons of microbial alpha diversity
	Metric	Mangrove_system	Depth	emmean	SE	lower.CL	upper.CL	Significance
	q0	Impaired Términos Lagoon	-	949.07	212.533	522.74	1375.4	a
	q0	Fossil Lagoon	-	1341.45	85.992	1156.08	1526.83	ab
	q0	San Pedro River	-	1508.35	57.177	1384.96	1631.73	b
	q1	Impaired Términos Lagoon	-	104.062	44.721	8.647	199.478	a
	q1	Fossil Lagoon	-	325.687	37.909	244.136	407.239	b
	q1	San Pedro River	-	332.296	24.929	278.401	386.191	b
	q0	-	Surface	1185.96	83.743	1017.7	1354.22	a
	q0	-	Mid	1291.05	83.06	1124.13	1457.96	ab
	q0	-	Deep	1321.87	76.462	1167.88	1475.85	b

## Sheet: Supplementary Table S8
Supplementary Table S8. Multivariate analysis of community composition (PERMANOVA) and dispersion (PERMDISP) in relict and impaired mangroves. Results are based on Bray–Curtis dissimilarities. The table reports the variance explained (R2), F-statistic, and significance (p-value) for mangrove system identity, sediment depth, and their interaction. The final column displays p-values for homogeneity…
Factor	Df	SumOfSqs	R2	F.Model	p_value	Dispersion_p
Mangrove_system	2	4.6337	0.3792	19.9485	0.001	0.0019
Depths	2	0.6098	0.0499	2.6251	0.001	0.077
Depths:Mangrove_type	2	0.9355	0.0766	4.0275	0.001	-

## Sheet: Supplementary Table S9
Supplementary Table S9. Linear mixed-effects models and pairwise comparisons of microbial alpha diversity across sediment depths in inland relict mangroves. The upper panel summarizes model statistics for Hill numbers (q0, q1, q2) and Faith’s Phylogenetic Diversity (qf), including estimates and p-values for depth horizons and specific localities (Fossil Lagoon, Reforma Waterfalls, and Miguelito D…
Metric	Term	Estimate	Std.Error	F	p_value
q0	(Intercept)	-5467.48	2792.66	-1.9578	0.0577
q0	log(Effective_reads)	643.225	232.777	2.7633	0.0089
q0	Depths16-30	444.481	180.16	2.4671	0.019
q0	Depths31-45	699.067	181.588	3.8497	0.0005
q0	Depths50-75	547.045	189.702	2.8837	0.0069
q0	LocationReforma Waterfalls	752.1	394.681	1.9056	0.0863
q0	LocationMiguelito Dike	396.382	334.628	1.1845	0.2637
q1	(Intercept)	596.154	121.896	4.8907	0.0002
q1	Depths16-30	214.101	85.4573	2.5054	0.0172
q1	Depths31-45	165.456	85.4573	1.9361	0.0612
q1	Depths50-75	131.757	90.2583	1.4598	0.1534
q1	LocationReforma Waterfalls	98.3362	167.971	0.5854	0.5709
q1	LocationMiguelito Dike	23.6504	142.521	0.1659	0.8714
q2	(Intercept)	166.939	41.1582	4.056	0.0007
q2	Depths16-30	87.6015	34.711	2.5237	0.0164
q2	Depths31-45	31.8883	34.711	0.9187	0.3647
q2	Depths50-75	35.5806	36.6064	0.972	0.3378
q2	LocationReforma Waterfalls	10.2314	53.7388	0.1904	0.8527
q2	LocationMiguelito Dike	1.7215	45.6974	0.0377	0.9706
qf	(Intercept)	-152.263	148.431	-1.0258	0.3116
qf	log(Effective_reads)	28.2289	12.3703	2.282	0.0284
qf	Depths16-30	26.1354	9.563	2.733	0.01
qf	Depths31-45	41.5295	9.639	4.3085	0.0001
qf	Depths50-75	32.4791	10.0702	3.2253	0.0028
qf	LocationReforma Waterfalls	25.3673	21.34	1.1887	0.2625
qf	LocationMiguelito Dike	11.0187	18.091	0.6091	0.5561
Pairwise comparisons of microbial alpha diversity
Metric	Depths	emmean	SE	lower.CL	upper.CL	Significance
q0	0-15	2698.72	186.274	2312.59	3084.85	a
q0	16-30	3143.2	184.468	2760.23	3526.17	ab
q0	50-75	3245.76	195.607	2843.16	3648.37	b
q0	31-45	3397.79	184.174	3015.32	3780.25	b
qf	0-15	201.451	10.006	180.685	222.217	a
qf	16-30	227.586	9.911	206.985	248.187	b
qf	50-75	233.93	10.496	212.304	255.555	b
qf	31-45	242.98	9.896	222.406	263.554	b

## Sheet: Supplementary Table S10
	Supplementary Table S10. Multivariate analysis of community structure (PERMANOVA) and dispersion (PERMDISP) in inland relict mangroves. Statistical results are provided for Unweighted UniFrac and Weighted UniFrac distances. The table reports the variance explained (R2), F-statistic, and significance (p-value) for locality and sediment depth. The final column displays p-values for homogeneity of m…
	Metric	Factor	Df	R2	F.Model	p_value	Dispersion_p
	Unweighted UniFrac	Location	2	0.3011	11.7586	0.001	0.2762
	Unweighted UniFrac	Depths	3	0.1356	3.53	0.001	0.8206
	Weighted UniFrac	Depths_fltr	1	0.3465	12.3654	0.002	0.5587
	Weighted UniFrac	Location	2	0.0932	1.6623	0.157	0.4628

[truncated: 1 more sheets: Supplementary Table XX Physicoc]
